# Supplementary material for: R-Unet: A Deep Learning Model for Rice Extraction in Rio Grande do Sul, Brazil
Source: MDPI journal article supplement (doi:10.3390/rs15164021), 2023-08-14
Supplement: s1 [file s1]

# R-Unet: A deep learning model for rice extraction in Rio Grande do Sul, Brazil

Tingyan Fu <sup>1</sup>, Shufang Tian <sup>1,\*</sup> and Jia Ge <sup>2</sup>

**Table S1.** Test results of the baseline models on Dataset 01- 06.

| Dataset   | Model             | Precision    | IOU          | Recall       | F1-score     | MCC          | OA           | Time(ms)     |
|-----------|-------------------|--------------|--------------|--------------|--------------|--------------|--------------|--------------|
| Dataset03 | R-Unet            | <u>0.939</u> | <u>0.852</u> | <u>0.903</u> | <u>0.920</u> | <u>0.886</u> | <u>0.951</u> | <u>29.39</u> |
|           | MFF-Unet          | 0.937        | 0.821        | 0.868        | 0.902        | 0.861        | 0.941        | 30.13        |
|           | Attention-ResUnet | 0.910        | 0.804        | 0.873        | 0.891        | 0.845        | 0.934        | 32.00        |
|           | Unet              | 0.923        | 0.836        | 0.899        | 0.911        | 0.872        | 0.946        | 29.86        |
|           | L-Unet            | .931         | 0.794        | 0.844        | 0.885        | 0.840        | 0.932        | 29.88        |
| Dataset05 | R-Unet            | <u>0.910</u> | <u>0.725</u> | 0.781        | <u>0.841</u> | <u>0.781</u> | <u>0.908</u> | <u>29.13</u> |
|           | MFF-Unet          | 0.851        | 0.702        | <u>0.801</u> | 0.825        | 0.755        | 0.899        | 30.55        |
|           | Attention-ResUnet | 0.904        | 0.657        | 0.705        | 0.793        | 0.728        | 0.888        | 33.64        |
|           | Unet              | 0.907        | 0.694        | 0.747        | 0.819        | 0.757        | 0.900        | 29.25        |
|           | L-Unet            | 0.901        | 0.697        | 0.754        | 0.821        | 0.757        | 0.899        | 30.94        |
| Dataset06 | R-Unet            | <u>0.880</u> | <u>0.474</u> | 0.507        | <u>0.643</u> | <u>0.575</u> | <u>0.826</u> | <u>28.04</u> |
|           | MFF-Unet          | 0.852        | 0.457        | 0.497        | 0.628        | 0.551        | 0.818        | 29.40        |
|           | Attention-ResUnet | 0.834        | 0.469        | <u>0.517</u> | 0.638        | 0.553        | 0.819        | 34.85        |
|           | Unet              | 0.855        | 0.422        | 0.454        | 0.593        | 0.524        | 0.808        | 29.86        |
|           | L-Unet            | 0.851        | 0.402        | 0.432        | 0.573        | 0.508        | 0.805        | 29.23        |
| Dataset04 | R-Unet            | <u>0.867</u> | <u>0.632</u> | 0.700        | <u>0.775</u> | <u>0.697</u> | <u>0.875</u> | 28.78        |
|           | MFF-Unet          | 0.855        | 0.632        | <u>0.708</u> | <u>0.775</u> | 0.693        | 0.873        | 29.53        |
|           | Attention-ResUnet | 0.854        | 0.587        | 0.653        | 0.740        | 0.656        | 0.858        | 35.08        |
|           | Unet              | 0.857        | 0.591        | 0.656        | 0.743        | 0.661        | 0.861        | <u>26.72</u> |
|           | L-Unet            | 0.859        | 0.611        | 0.679        | 0.758        | 0.677        | 0.866        | 29.91        |
| Dataset01 | R-Unet            | <u>0.829</u> | <u>0.733</u> | 0.863        | <u>0.846</u> | <u>0.775</u> | <u>0.903</u> | 28.12        |
|           | MFF-Unet          | 0.808        | 0.715        | 0.861        | 0.834        | 0.757        | 0.894        | 30.22        |
|           | Attention-ResUnet | 0.824        | 0.721        | 0.853        | 0.838        | 0.759        | 0.894        | 33.90        |
|           | Unet              | 0.799        | 0.724        | <u>0.885</u> | 0.840        | 0.758        | 0.889        | <u>26.81</u> |
|           | L-Unet            | 0.806        | 0.714        | 0.863        | 0.833        | 0.760        | 0.897        | 29.74        |
| Dataset02 | R-Unet            | <u>0.772</u> | <u>0.506</u> | 0.595        | <u>0.672</u> | <u>0.560</u> | <u>0.821</u> | 27.97        |
|           | MFF-Unet          | 0.676        | 0.505        | <u>0.667</u> | 0.671        | 0.526        | 0.798        | 28.45        |
|           | Attention-ResUnet | 0.751        | 0.499        | 0.598        | 0.666        | 0.551        | 0.820        | 32.61        |
|           | Unet              | 0.756        | 0.503        | 0.601        | 0.670        | 0.552        | 0.817        | <u>26.87</u> |
|           | L-Unet            | 0.718        | 0.478        | 0.588        | 0.647        | 0.520        | 0.806        | 28.57        |
